# Supplementary material
Source: publisher figshare collection journal article supplement (https://gsajournals.figshare.com/ndownloader/files/14564885)
Supplement: Supplementary file 1 [file 14564885]

**Table S2. 3rd chromosome EMS mutations in heterochromatin identified through screening*.***

| **Mutation** | ***Df(3L)FX53*** | ***Df(3LR) 6B­29*** | ***Df(3R)XM3*** | ***Df(3L) Δ1­AK*** | **Allelic with** |
| --- | --- | --- | --- | --- | --- |
| ***Z-272*** | LETHAL | viable | viable | viable | *SNAP­25*  (lethal/FX33 and O­1) |
| ***Z-732*** | LETHAL | viable | viable | LETHAL | *lethal 6* (lethal/FX33 and O­1) |
| ***Z-512*** | LETHAL | viable | viable | viable | *lethal 8* (lethal/FX33 and O­1) |
| ***Z-1555*** | LETHAL | viable | viable | viable | *lethal 8* (lethal/FX33 and O­1) |
| ***Z-112*** | LETHAL | viable | viable | viable | *lethal 7B (scarecrow)* |
| ***Z-247*** | LETHAL | viable | viable | viable | *lethal 7B (scarecrow)* |
| ***Z-211*** | LETHAL | viable | viable | viable | *lethal 7B (scarecrow)* |
| ***Z-855*** | SEMI­LETHAL  (3/92; die early, sterile) | viable | viable | viable | ? |
| ***Z-1326*** | viable | viable | viable | LETHAL | ? |
| ***Z-1605*** | viable | viable | viable | LETHAL | ? |
| ***Z-110*** | LETHAL | LETHAL | viable | viable | *lethal 4A* |
| ***Z-803*** | LETHAL | LETHAL | viable | viable | *lethal 4A* |
| ***Z-5413*** | LETHAL | LETHAL | viable | viable | *lethal 4B* |
| ***Z-1973*** | LETHAL | LETHAL | viable | viable | *lethal 4B* |
| ***Z-760*** | LETHAL | LETHAL | viable | viable | *lethal 4B* |
| ***Z-436*** | LETHAL | LETHAL | viable | viable | *lethal 5* |
| ***Z-446*** | LETHAL | LETHAL | viable |  | *lethal 5, lethal l7A* |
| ***Z-480*** | LETHAL | LETHAL | viable | viable | *lethal 5* |
| ***Z-1261*** | viable | LETHAL | viable | viable | *lethal 1* |
| ***Z-4577*** | viable | LETHAL | viable | viable | *lethal 1* |
| ***Z-5460*** | viable | LETHAL | viable | ND | Lethal over  *Df(3L)1­166,*  *Df(3L)K2* and  *Df(3L)γ­26* |
| ***Z-1935*** | viable | LETHAL | viable | viable | ? |
| ***Z-297*** | viable | LETHAL | viable | viable | ? |
| ***Z-763*** | viable | LETHAL | viable | viable | ? |
| ***Z-4476*** | viable | LETHAL | viable | viable | ? |
| ***Z-4510*** | viable | LETHAL | viable | ND | ? |
| ***Z-1029*** | viable | LETHAL | viable | ND | ? |
